# Supplementary figures and images for: Corilagin relieves atherosclerosis via the toll-like receptor 4 signaling pathway in vascular smooth muscle cells
Source: PubMed Central journal article supplement — Int J Immunopathol Pharmacol. 2024 Jun 13;38:03946320241254083. doi: 10.1177/03946320241254083 (PMC11179462; doi:10.1177/03946320241254083), 2024-06-13

Supplement Fig 1

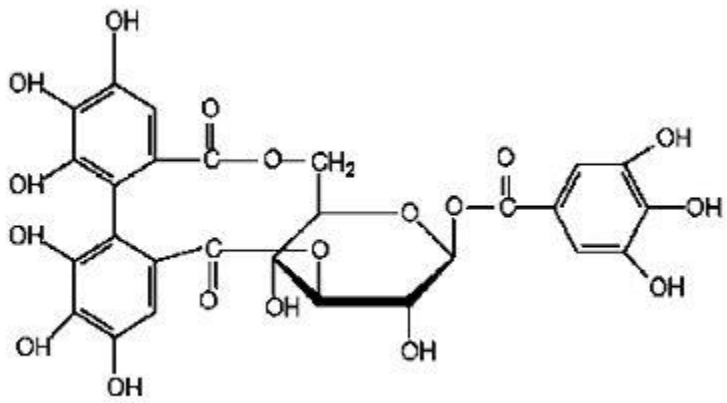

Supplement fig 2

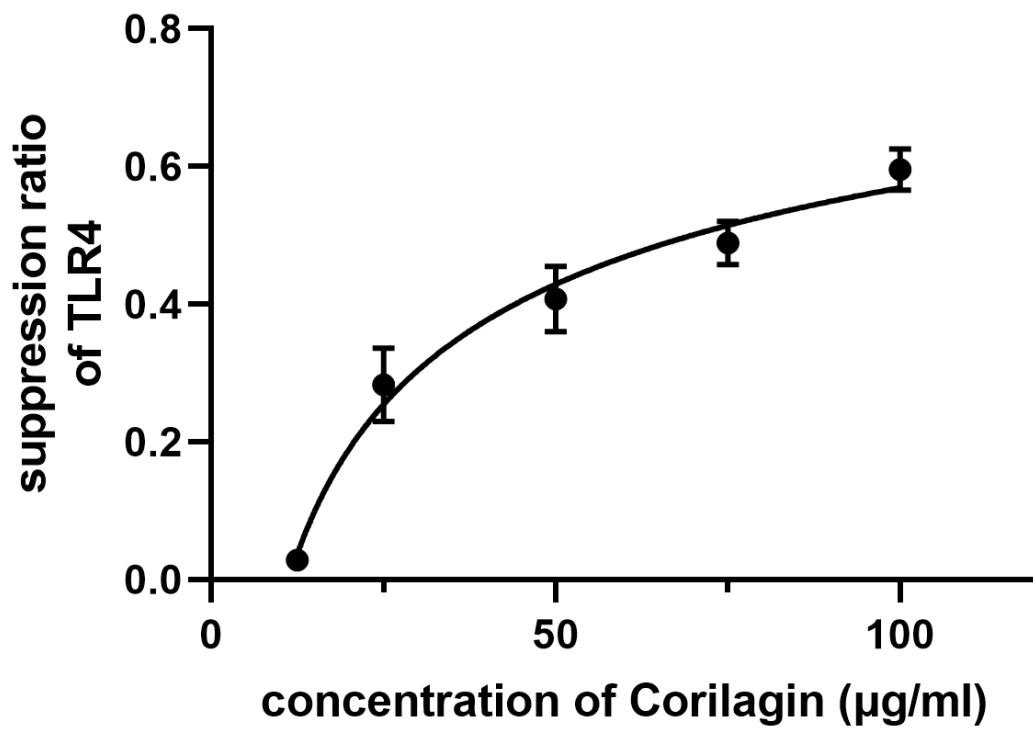

Supplement fig 3

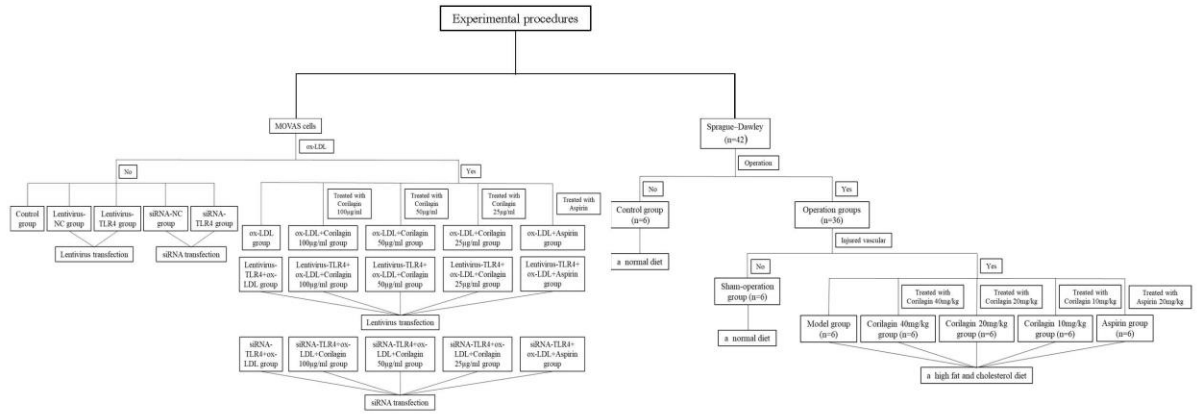

Supplement fig 4

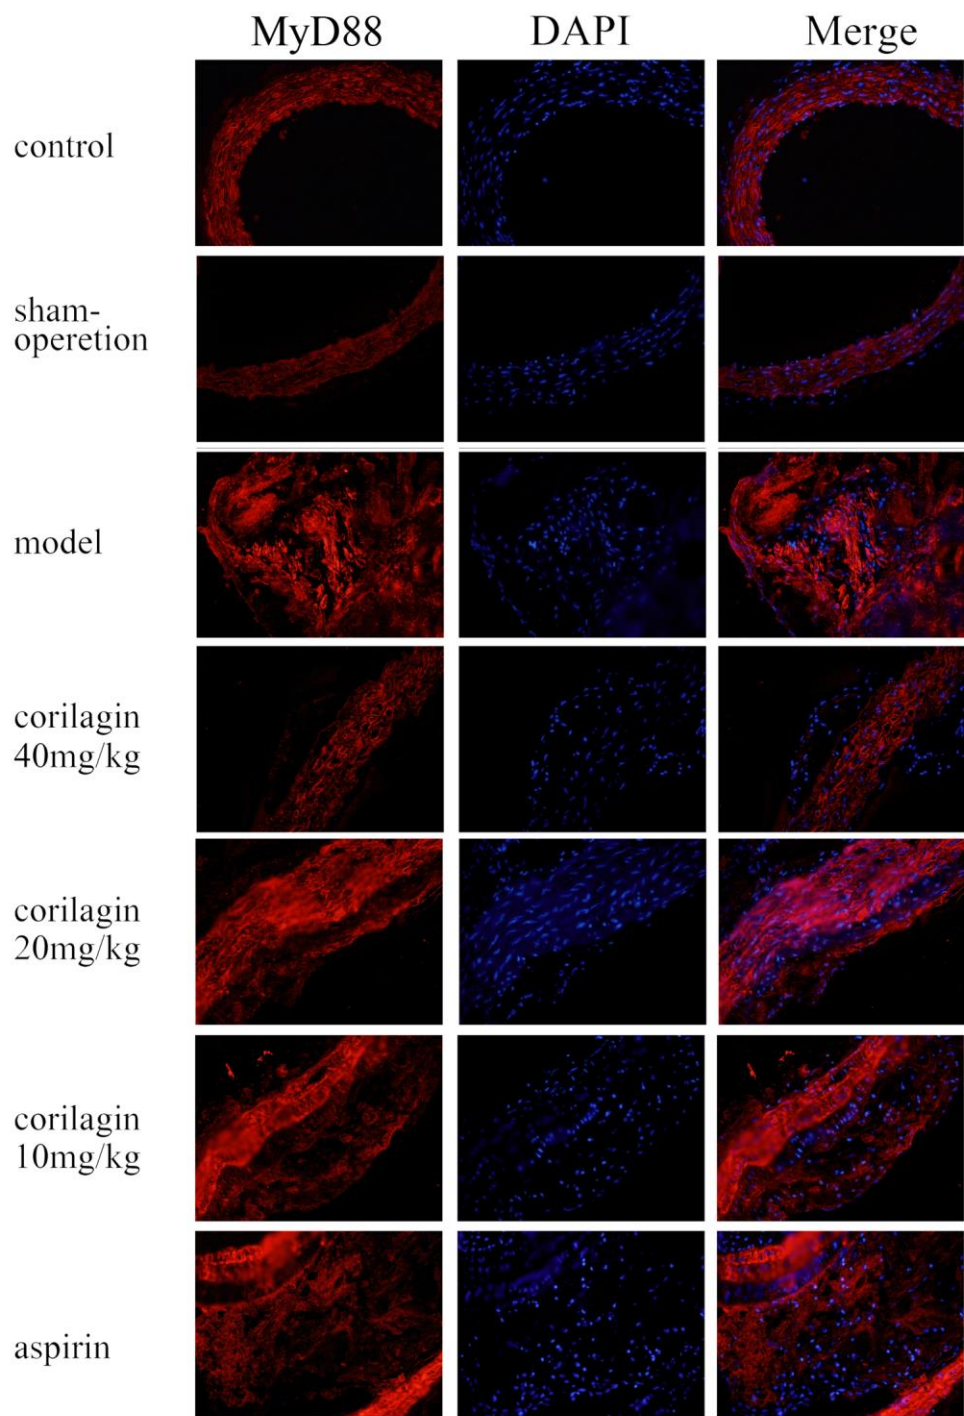

Supplement: sj-pdf-1-iji-10.1177_03946320241254083.pdf [file sj-pdf-1-iji-10.1177_03946320241254083.pdf]
